# Supplementary material for: Efficacy and Efficiency of Artificial Intelligence-based Preoperative Anesthesia Evaluation: A Randomized Controlled Non-Inferiority Study
Source: Research Square preprint supplement (doi:10.21203/rs.3.rs-7364932/v1), 2025-09-22
Supplement: Supplementary file 2 [file 90902ee3183dda02bd995b0a.docx]

| **Question** | **Strongly Agree** | **Agree** | **Neutral** | **Disagree** | **Strongly Disagree** |
| --- | --- | --- | --- | --- | --- |
| *I clearly understand the anesthesia procedure* |  |  |  |  |  |
| *I clearly understand the anesthesia risks* |  |  |  |  |  |
| *My questions about anesthesia were addressed during assessment* |  |  |  |  |  |
| *I no longer have any fear or anxiety about anesthesia* |  |  |  |  |  |
| *I am very satisfied with the anesthesia assessment process* |  |  |  |  |  |

Supplementary Table 1. Anesthesia assessment effect questionnaire
