# Supplementary material for: Efficacy and Efficiency of Artificial Intelligence-based Preoperative Anesthesia Evaluation: A Randomized Controlled Non-Inferiority Study
Source: Research Square preprint supplement (doi:10.21203/rs.3.rs-7364932/v1), 2025-09-22
Supplement: Supplementary file 3 [file c7dc1094141b3b3576844699.docx]

Supplementary Table 2. Anesthesia assessment quality audit questionnaire

| **Item** | **VeryAccurate** | **Incomplete** | **Ambiguous** | **Incorrect** | **CompletelyMissing** |
| --- | --- | --- | --- | --- | --- |
| Patient Demographics |  |  |  |  |  |
| Medical History |  |  |  |  |  |
| Medication History |  |  |  |  |  |
| Surgical and Anesthesia History |  |  |  |  |  |
| Smoking and Alcohol History |  |  |  |  |  |
| Allergy History |  |  |  |  |  |
| Airway (Dentition) |  |  |  |  |  |
| Physical Status |  |  |  |  |  |
| Cardiovascular System |  |  |  |  |  |
| Respiratory System |  |  |  |  |  |
| Nervous System |  |  |  |  |  |
| Endocrine System |  |  |  |  |  |
| Musculoskeletal System |  |  |  |  |  |
| Digestive System |  |  |  |  |  |
| Hematologic System |  |  |  |  |  |
